# Supplementary material for: A nano-LiNbO3 coating layer and diffusion-induced surface control towards high-performance 5 V spinel cathodes for rechargeable batteries
Source: Royal Society of Chemistry journal article supplement (doi:10.1039/c7ta07898f), 2017-01-01
Supplement: c7ta07898f1.pdf [file c7ta07898f1.pdf]

## ***Supplementary Information***

# **Nano-LiNbO<sub>3</sub> coating layer and diffusion-induced surface control towards high-performance 5-V spinel cathodes for rechargeable batteries**

**Hyeongwoo Kim<sup>a,b</sup>, Dongjin Byun<sup>b</sup>, Wonyoung Chang<sup>a,c</sup>, Hun-Gi Jung<sup>a,c</sup>, Wonchang Choi<sup>a,c\*</sup>**

<sup>a</sup> Center for Energy Convergence Research, Korea Institute of Science and Technology, Hwarangno 14-gil 5, Seongbuk-gu, Seoul 136-791, Republic of Korea

<sup>b</sup> Department of Materials science and Engineering, Korea University, 17, Anam-dong, Sungbuk-gu, Seoul 136-701, Republic of Korea

<sup>c</sup> Division of Energy & Environment Technology, KIST School, Korea University of Science and Technology, Seoul 02792, Republic of Korea

\*Email - wonchangchoi@kist.re.kr

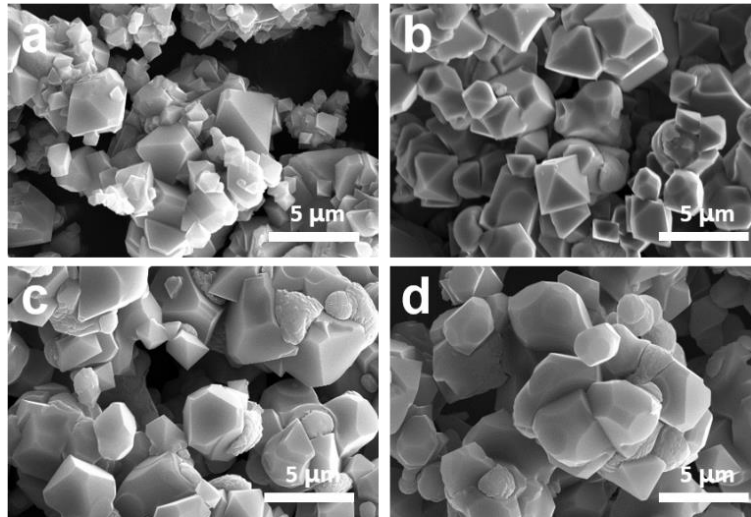

**Fig. S1** Field-emission SEM images of (a) pristine  $\text{LiNi}_{0.5}\text{Mn}_{1.5}\text{O}_4$ , (b) 1 wt.%, (c) 3 wt.% and (d) 5 wt.%  $\text{LiNbO}_3$ -coated  $\text{LiNi}_{0.5}\text{Mn}_{1.5}\text{O}_4$ .

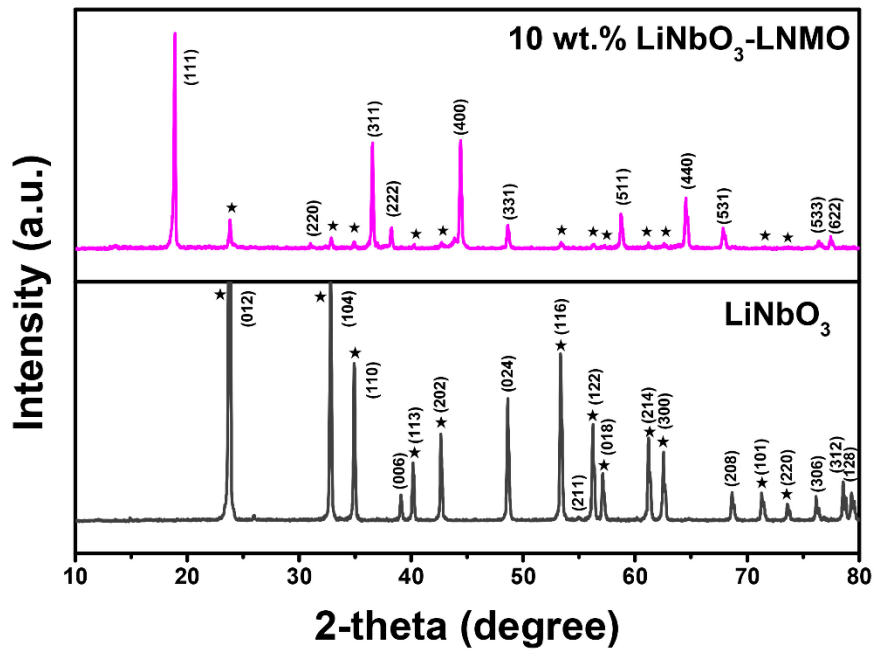

Fig. S2 XRD patterns of the 10 wt.% LiNbO<sub>3</sub>-coated LNMO and LiNbO<sub>3</sub>.

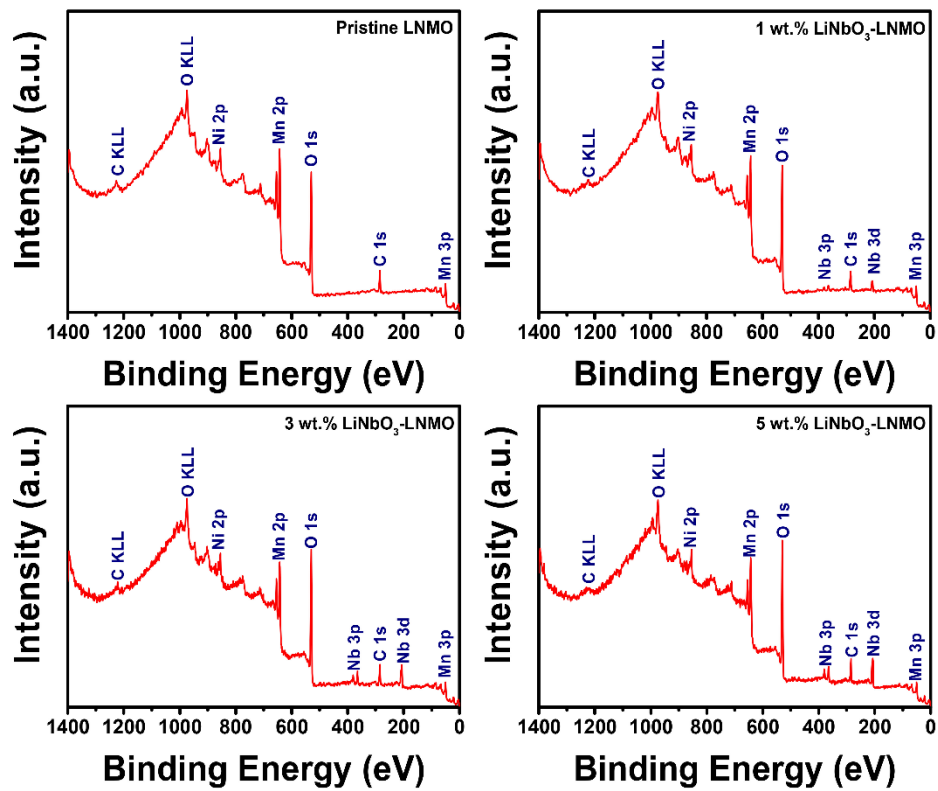

Fig. S3 XPS full-scan spectra of pristine LNMO and various amounts of LiNbO<sub>3</sub>-coated LNMO.

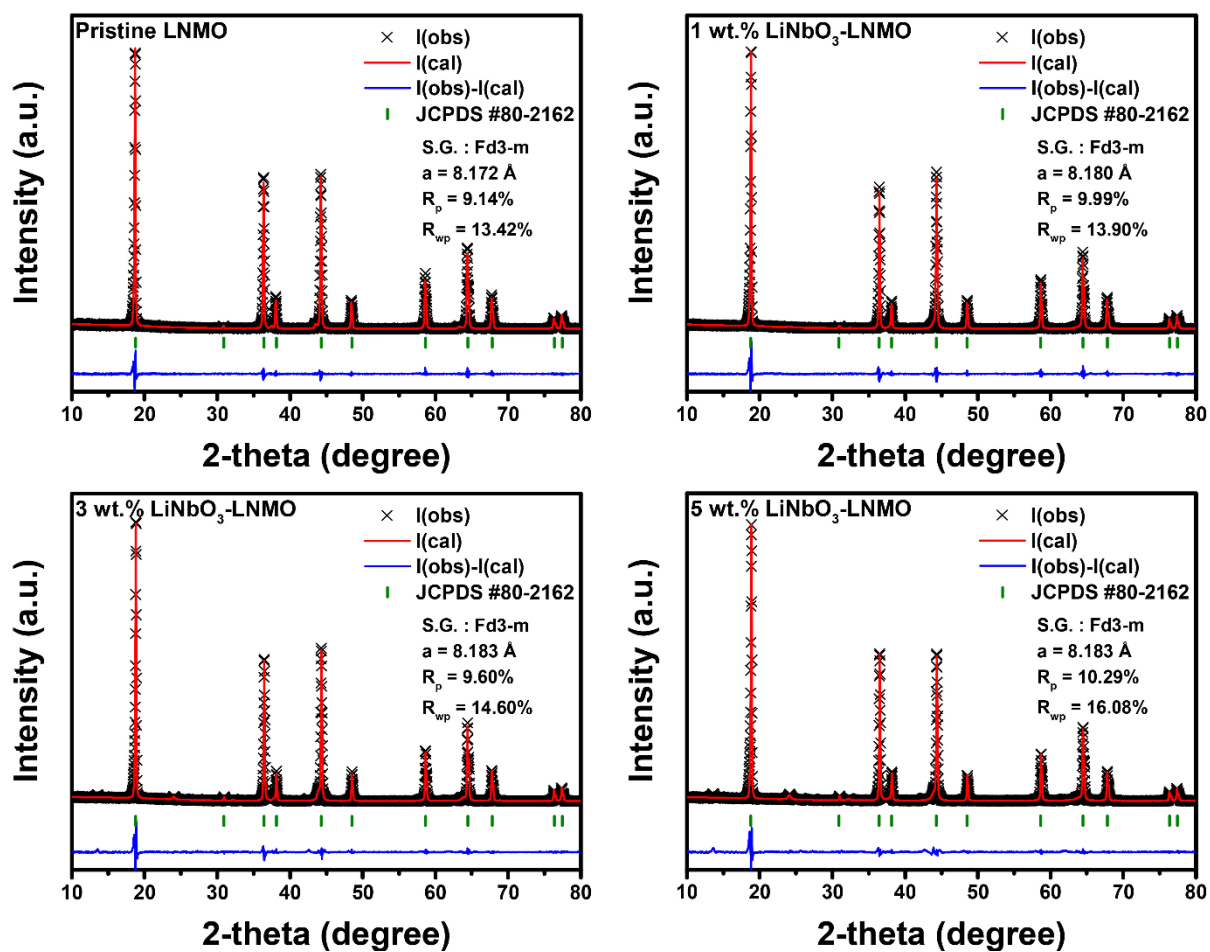

**Fig. S4** Rietveld refined XRD patterns of pristine LNMO and various amount of LiNbO<sub>3</sub>-coated LNMO. The black and red lines represent the experimental and calculated data, respectively. The blue line is the difference curve. The Bragg peak positions of each phase are indicated by the short vertical dark green lines.

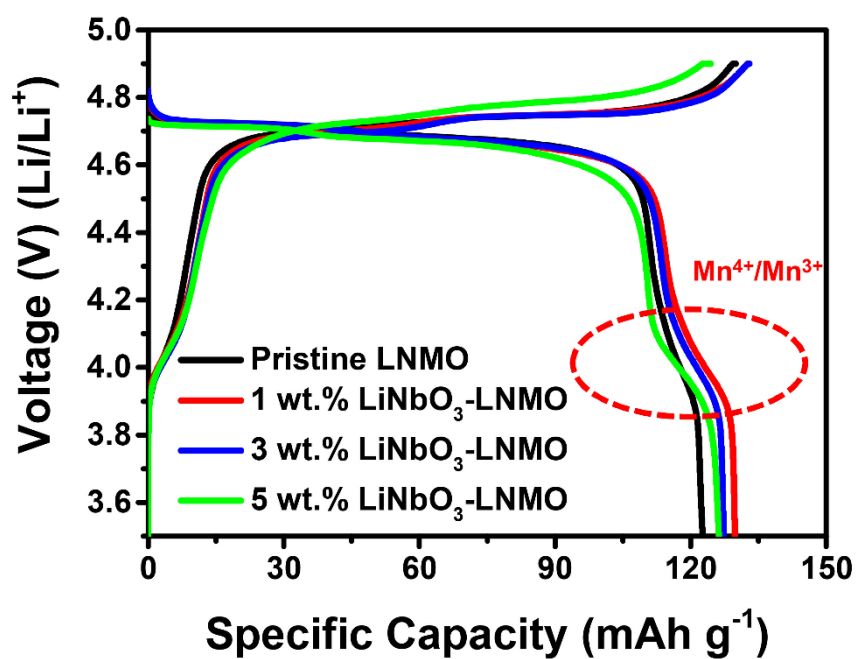

**Fig. S5** Initial charge-discharge voltage profiles at 0.1 C of pristine LNMO and various amount of LiNbO<sub>3</sub>-coated LNMO in the potential range of 3.5–4.9 V (vs. Li/Li<sup>+</sup>).

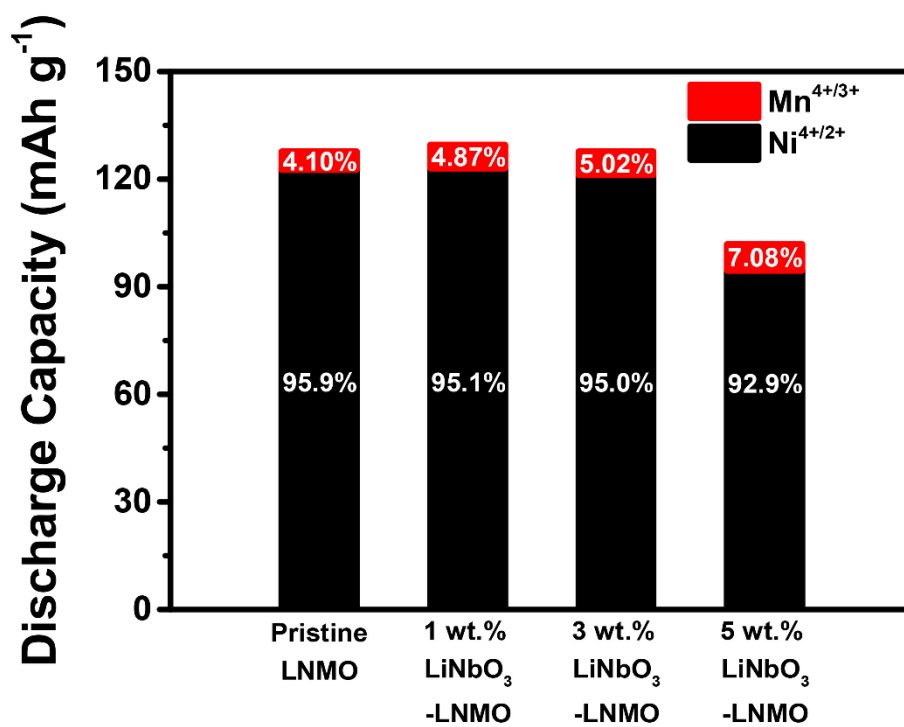

**Fig. S6** Discharge capacity contributions of Ni<sup>4+/2+</sup> and Mn<sup>4+/3+</sup> calculated from the initial charge-discharge voltage profiles in Fig. S5.

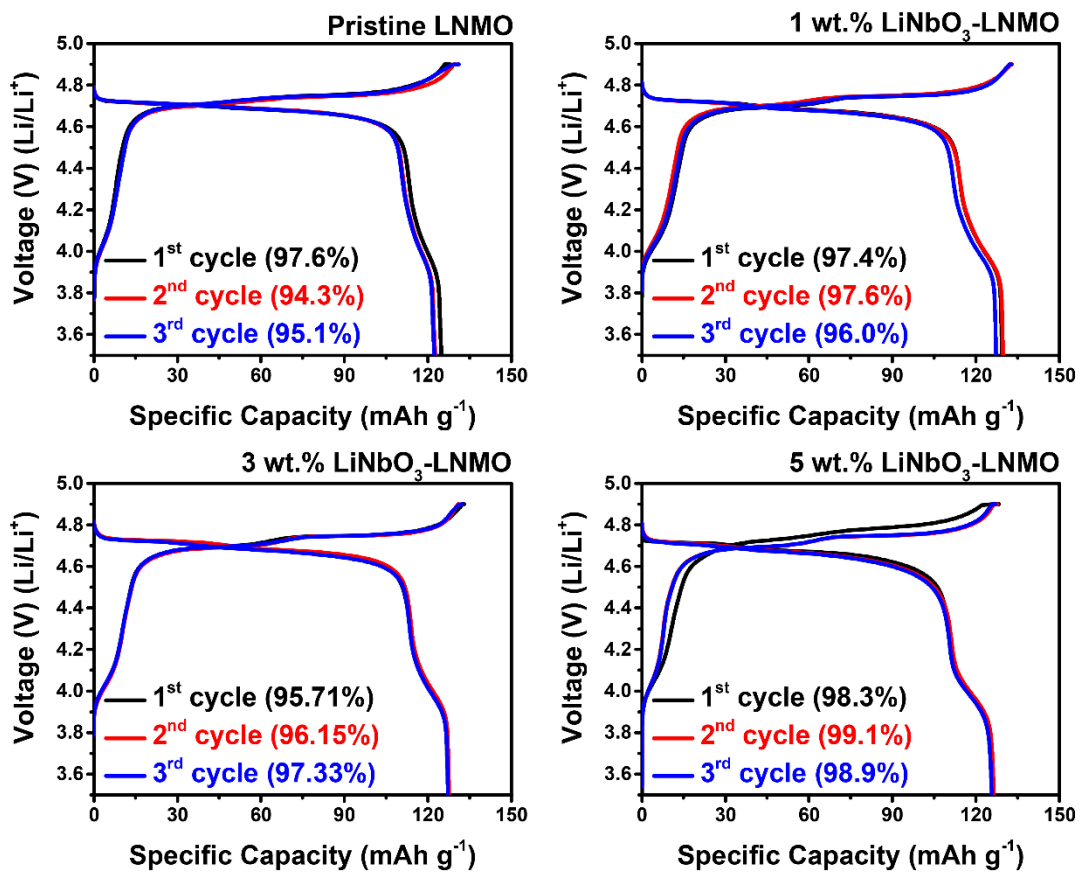

**Fig. S7** Charge-discharge voltage profiles with Coulombic efficiency (%) of pristine LNMO and various amount of LiNbO<sub>3</sub>-coated LNMO for 3 cycles at 0.1 C.



**Table S1** Electronic conductivities for the pristine LNMO and various amount of LiNbO<sub>3</sub>-coated LNMO.

| <b>Sample</b>                        | <b>Conductivity (S cm<sup>-1</sup>)</b> |
|--------------------------------------|-----------------------------------------|
| <b>Pristine LNMO</b>                 | $2.09 \times 10^{-7}$                   |
| <b>1 wt.% LiNbO<sub>3</sub>-LNMO</b> | $1.35 \times 10^{-6}$                   |
| <b>3 wt.% LiNbO<sub>3</sub>-LNMO</b> | $1.27 \times 10^{-6}$                   |
| <b>5 wt.% LiNbO<sub>3</sub>-LNMO</b> | $9.79 \times 10^{-7}$                   |

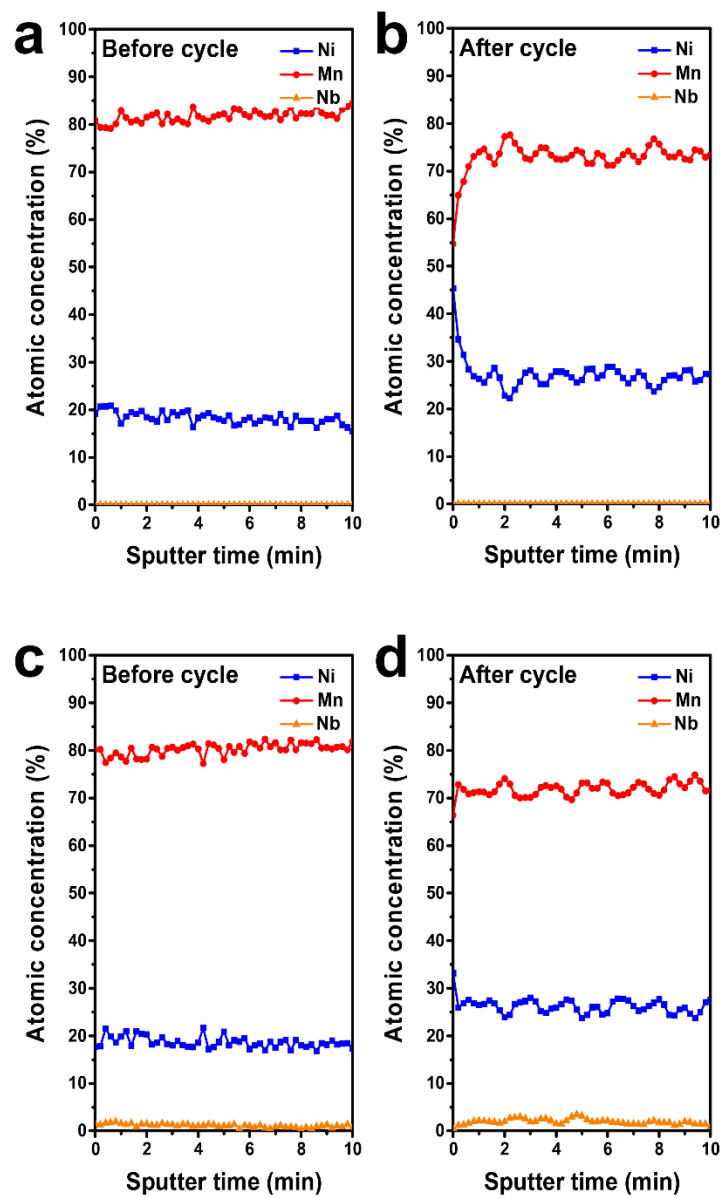

**Fig. S8** XPS depth profiles of before and after 100 cycled electrodes at 60°C for (a,b) pristine

$\text{LiNi}_{0.5}\text{Mn}_{1.5}\text{O}_4$  and (c,d) 1 wt.%  $\text{LiNbO}_3$ -coated  $\text{LiNi}_{0.5}\text{Mn}_{1.5}\text{O}_4$ .

**Table S2** The result of inductively coupled plasma optical emission spectrometry (ICP-OES) of Li metal anodes after 100 cycled at 60°C.

| Cathode                         | Deposited Mn on Li metal anode (ppm) |
|---------------------------------|--------------------------------------|
|                                 | Mn                                   |
| Pristine LNMO                   | 183.7                                |
| 1 wt.% LiNbO <sub>3</sub> -LNMO | 90.17                                |
| 3 wt.% LiNbO <sub>3</sub> -LNMO | 86.37                                |
| 5 wt.% LiNbO <sub>3</sub> -LNMO | 46.68                                |
